# Supplementary material for: Scoping review protocol on the use of social media for health research purposes
Source: HighWire-hosted journal article supplement (doi:10.1136/bmjopen-2020-040671), 2021-02-01
Supplement: bmjopen-2020-040671supp001_data_supplement.pdf [file bmjopen-2020-040671supp001_data_supplement.pdf]

### **Appendix A : Pilot search strategy for a scoping review protocol on the use of social media for health research purposes**

The pilot search strategy is developed on the PubMed/MEDLINE database.

| <u>Step</u> | <u>Search terms / description</u>                                                                                                                                                                                                                                                                                                                                                                                                                                                                                                                                                                                                                                                                                          |
|-------------|----------------------------------------------------------------------------------------------------------------------------------------------------------------------------------------------------------------------------------------------------------------------------------------------------------------------------------------------------------------------------------------------------------------------------------------------------------------------------------------------------------------------------------------------------------------------------------------------------------------------------------------------------------------------------------------------------------------------------|
| 1           | <p>((("Social Media"[MH]) OR ("Social Media"[TW])) AND ((("Biomedical research"[MH]) OR ("Medical research"[TW] OR "Biomedical research"[TW]) OR ("Health research"[TW] OR "Health services research"[TW]) OR ("Nursing research"[TW]) OR (Research[OT]))) OR (((("Social networking"[MH]) OR ("Social network"[TW] OR "Social networks"[TW] OR "Social networking"[TW])) AND ((("Biomedical research"[MH]) OR ("Medical research"[TW] OR "Biomedical research"[TW]) OR ("Health research"[TW] OR "Health services research"[TW]) OR ("Nursing research"[TW]) OR (Research[OT]))))</p> <p><b>Filters:</b> From 2000/01/01 to 2020/04/09, Clinical Study; Journal Article; Letter; Observational Study; Humans; English</p> |
| 2           | Manual search in the reference lists of the relevant studies                                                                                                                                                                                                                                                                                                                                                                                                                                                                                                                                                                                                                                                               |
| 3           | Iterative refinements of stage 1                                                                                                                                                                                                                                                                                                                                                                                                                                                                                                                                                                                                                                                                                           |
| 4           | Adapting the final research strategy to Web of Science                                                                                                                                                                                                                                                                                                                                                                                                                                                                                                                                                                                                                                                                     |
